# Supplementary material for: A BRCA1-mutation associated DNA methylation signature in blood cells predicts sporadic breast cancer incidence and survival
Source: PubMed Central journal article supplement (PMC4110671; doi:10.1186/gm567), 2014-06-27

(A)

BC Diagnosis (upto 2 years)

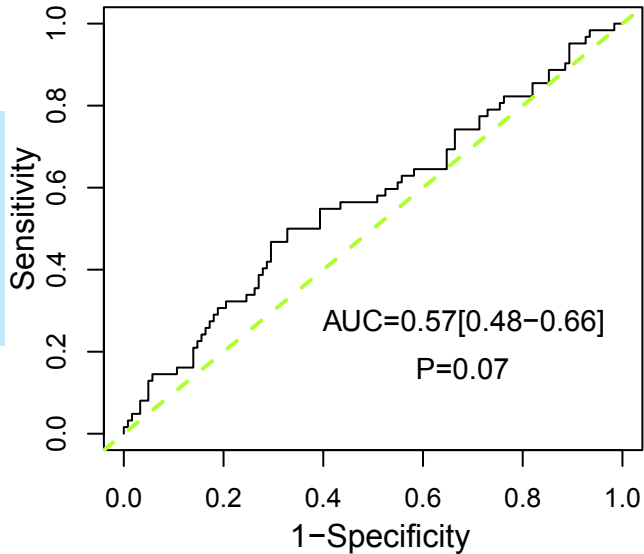

(B)

BC Diagnosis (more than 2 years)

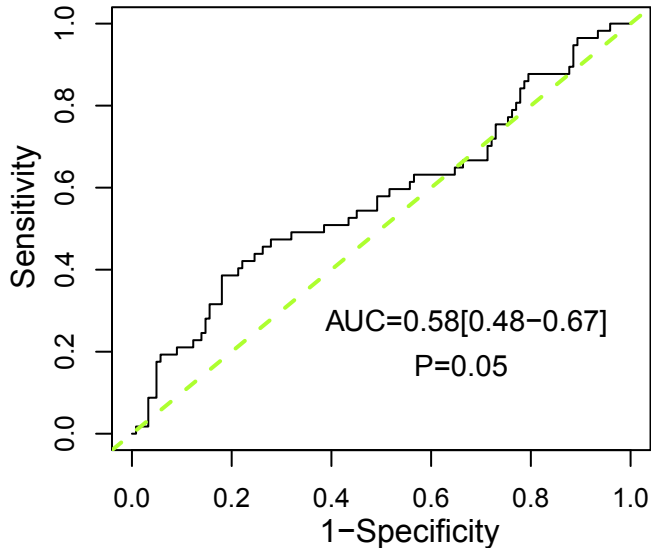

Supplement: gm567-S12.pdf [file gm567-S12.pdf]
