# Supplementary material for: A BRCA1-mutation associated DNA methylation signature in blood cells predicts sporadic breast cancer incidence and survival
Source: PubMed Central journal article supplement (PMC4110671; doi:10.1186/gm567), 2014-06-27

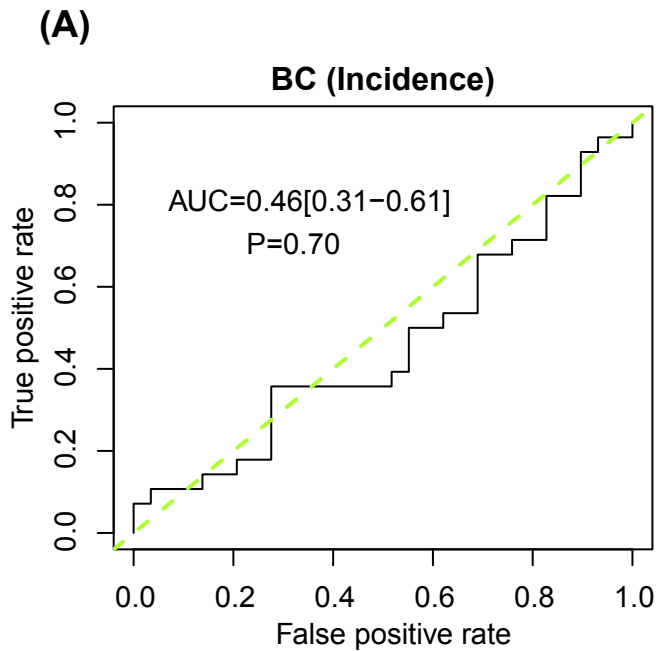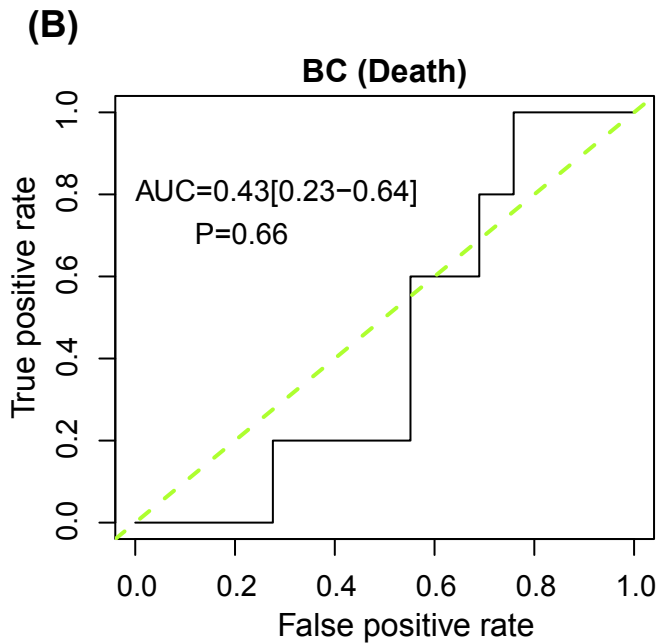

Supplement: gm567-S18.pdf [file gm567-S18.pdf]
